# Supplementary material for: Rapid Assay for the Therapeutic Drug Monitoring of Edoxaban
Source: MDPI journal article supplement (doi:10.3390/biom12040590), 2022-04-17
Supplement: s1 [file s1]

## Supplementary Material

### Rapid assay for the therapeutic drug monitoring of edoxaban

Md Abdur Rashid,<sup>1\*</sup> Saiqa Muneer,<sup>2</sup> Yahya Alhamhoom,<sup>1</sup> and Nazrul Islam<sup>3</sup>,

<sup>1</sup>Department of Pharmaceutics, College of Pharmacy, King Khalid University, Guraiger, Abha 62529, Kingdom of Saudi Arabia.

<sup>2</sup>School of Chemistry and Physics, Faculty of Science, Queensland University of Technology, Brisbane, 4000, Queensland, Australia.

<sup>3</sup>Pharmacy Discipline, School of Clinical Sciences, Faculty of Health, Queensland University of Technology, Brisbane, 4000, Queensland, Australia.

Corresponding author: Md Abdur Rashid: [mdrashid@kku.edu.sa](mailto:mdrashid@kku.edu.sa)

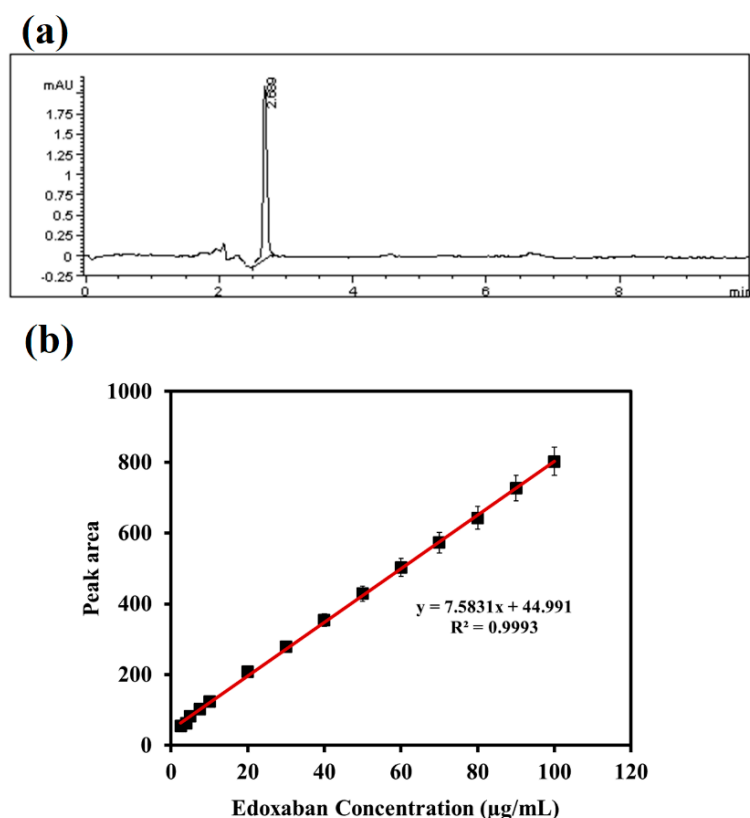

**Fig. S1** (a) Chromatographic separation of edoxaban by HPLC-UV method (b) calibration plot of the drug at retention time of 2.68 min.

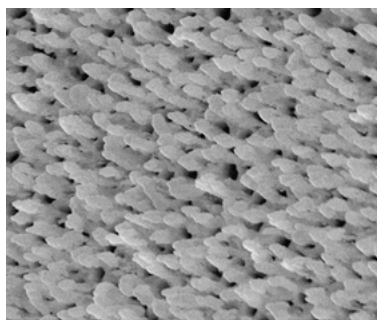

**Fig. S2** SEM image of the gold coated silicon nanopillar substrate

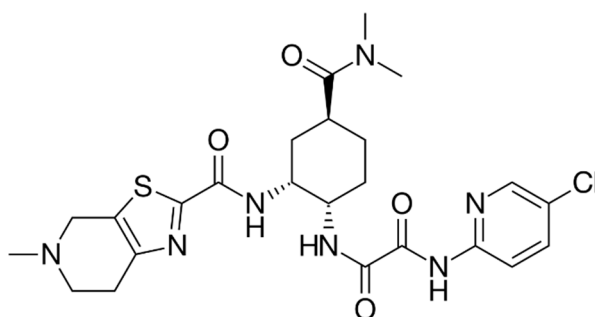

**Fig S3.** Chemical structure of edoxaban

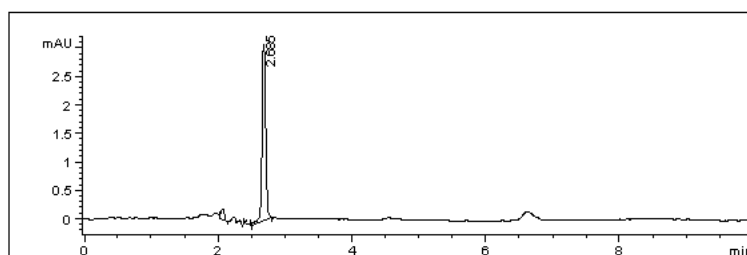

**Fig. S4.** Chromatographic separation of edoxaban by HPLC-SERS method (retention time of the drug = 2.68 min)
